# Supplementary material for: The adenine DNA self-assembly of pH- and near-infrared-responsive gold nanorod vehicles for the chemothermal treatment of cancer cells
Source: Royal Society of Chemistry journal article supplement (doi:10.1039/c4tb00103f), 2014-01-01
Supplement: c4tb00103f1.pdf [file c4tb00103f1.pdf]

## Supporting Information

### Adenine DNA Self-Assembled of pH- and Near-Infrared-Responsive Gold Nanorods Vehicle for Chemothermal Treatment of Cancer Cells

Mian Chen<sup>§</sup>, Pengchao Qiu<sup>§</sup>, Xiaoxiao He\*, Kemin Wang\*, Suye Chen, Shuna Yang and Xiaosheng Ye

E-mail: kmwang@hnu.edu.cn. <sup>§</sup>: These authors contributed equally.

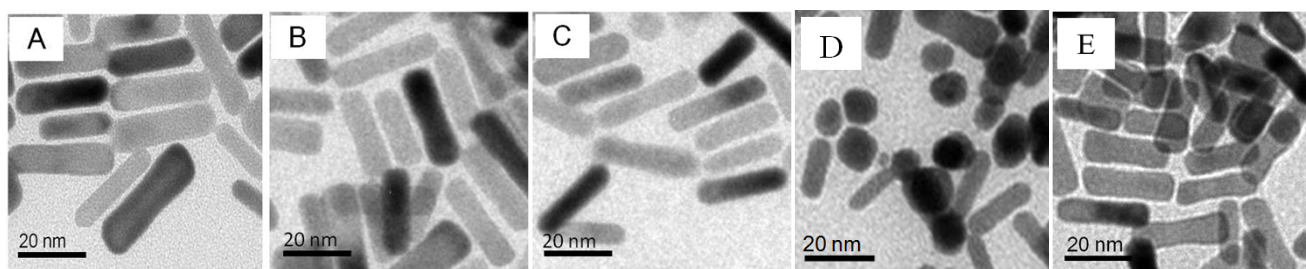

**Fig. S1** TEM image of (A) AuNR, (B) poly(A)/AuNR, (C) coralyne@poly(A)/AuNR, (D) AuNR with 20min NIR laser irradiation and (E) poly(A)/AuNR with 20min NIR laser irradiation.

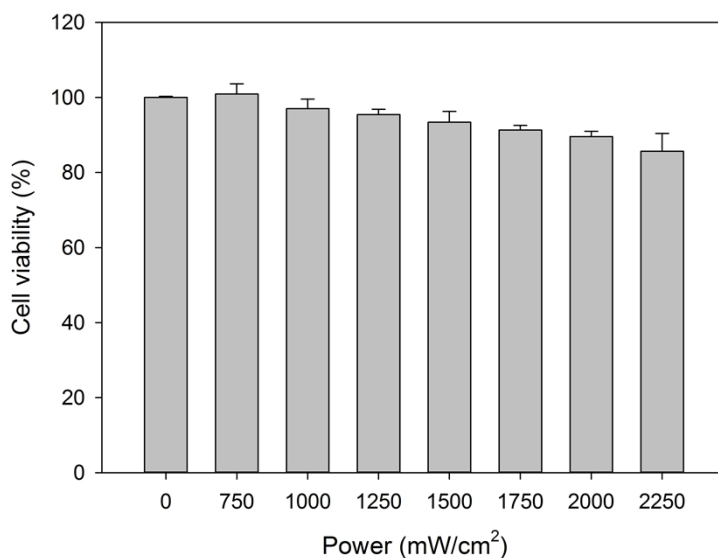

**Fig. S2** Cytotoxicity assay of SMMC-7721 cells treated with different radiated power of 780 nm laser for 5 min.

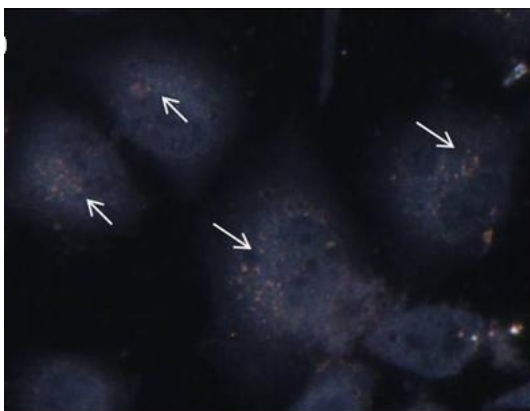

**Fig. S3** The dark field microscopy study of the intracellular distribution of the coralyne@poly(A)/AuNR after incubation with SMMC-7721 cells for 3 h. The concentration of coralyne@poly(A)/AuNR was 0.04 nM.
